# Supplementary material for: Fully automated, deep learning segmentation of oxygen-induced retinopathy images
Source: JCI journal article supplement (doi:10.1172/jci.insight.97585), 2017-12-20
Supplement: sd1 [file 1]

**SUPPLEMENTARY FIGURES**

**Supplementary Figure 1: Learning curves for segmentation of vaso-obliteration region.**

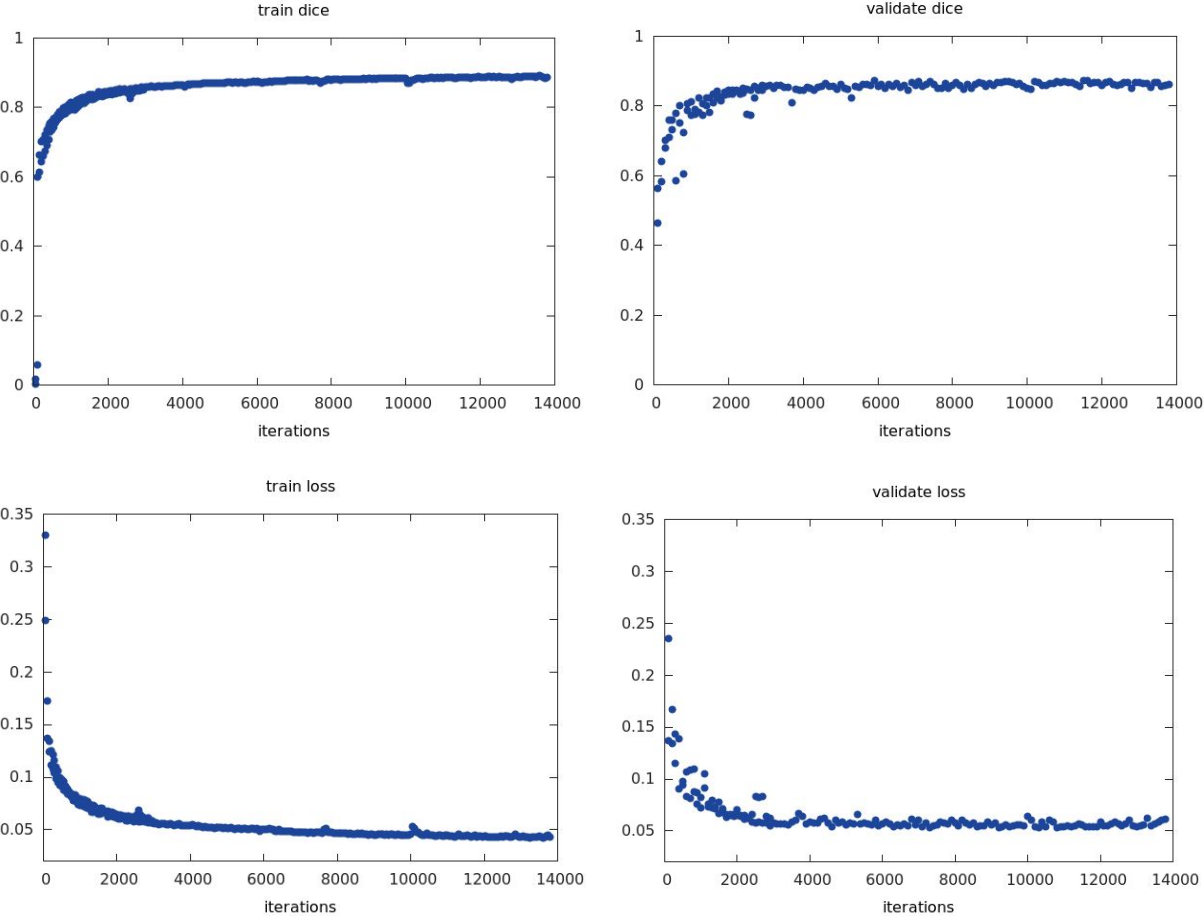

Upper left and upper right shows Dice coefficient of training set and validation sets, respectively. Lower left and lower right shows loss function by pixel-wise binary cross entropy of training and validation sets, respectively.

**Supplementary Figure 2: Learning curves for segmentation of neovascular tufts.**

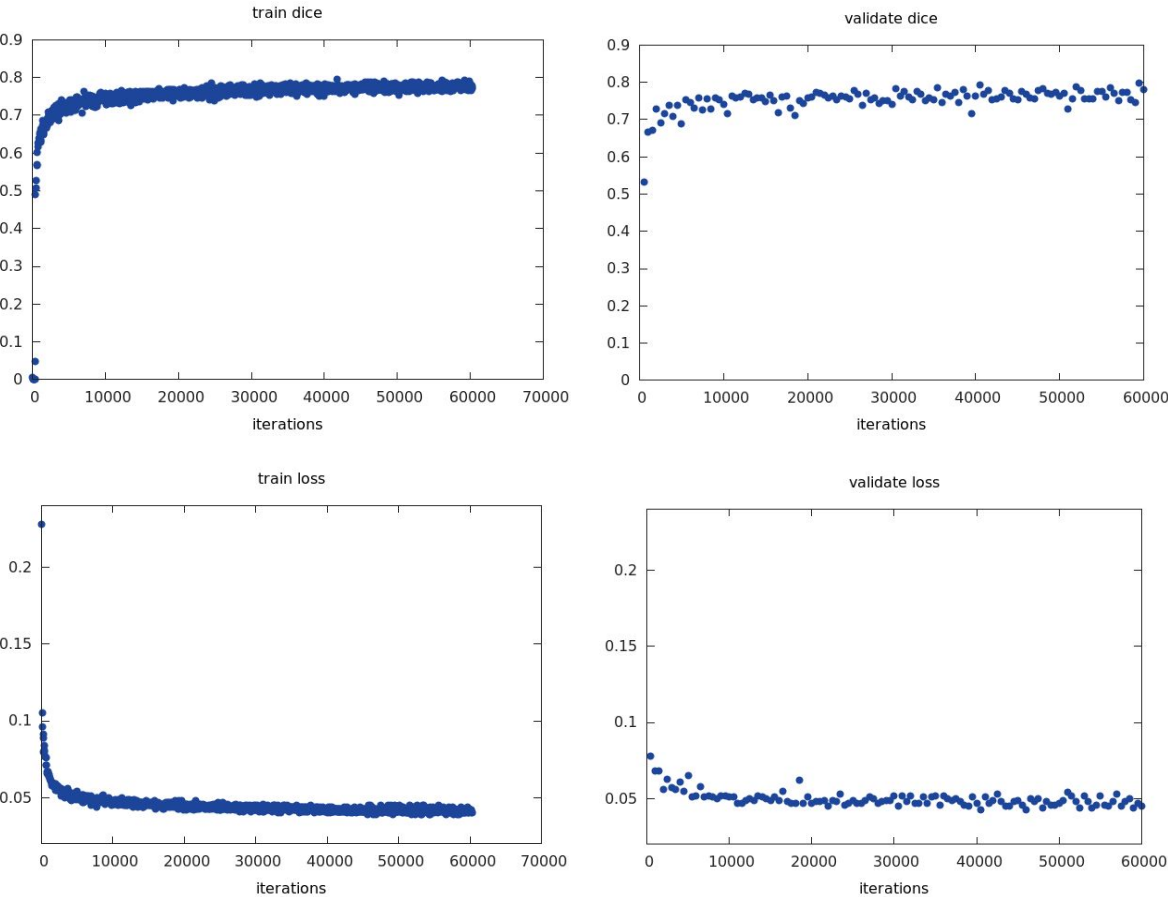

Upper left and upper right shows Dice coefficient of training set and validation sets, respectively. Lower left and lower right shows loss function by pixel-wise binary cross entropy of training and validation sets, respectively.
